# Supplementary material for: Pre- and post-diagnostic β-blocker use and lung cancer survival: A population-based cohort study
Source: PubMed Central journal article supplement (PMC5460218; doi:10.1038/s41598-017-02913-8), 2017-06-06
Supplement: 41598_2017_2913_MOESM1_ESM.pdf [file 41598_2017_2913_MOESM1_ESM.pdf]

## SUPPLEMENTARY MATERIAL

### Pre- and post-diagnostic $\beta$ -blocker use and lung cancer survival:

#### A population-based cohort study

Janick Weberpals<sup>1</sup>, RPh, Lina Jansen<sup>1</sup>, PhD, Walter E. Haefeli<sup>2</sup>, MD, Michael Hoffmeister<sup>1</sup>, PhD, Martin Wolkewitz<sup>3</sup>, PhD, Myrthe P. P. van Herk-Sukel<sup>4</sup>, PhD, Pauline A.J. Vissers<sup>5</sup>, PhD, Hermann Brenner<sup>\*1,6,7</sup>, MD, MPH

<sup>1</sup> Division of Clinical Epidemiology and Aging Research, German Cancer Research Center (DKFZ), Heidelberg, Germany

<sup>2</sup> Department of Clinical Pharmacology and Pharmacoepidemiology, University Hospital of Heidelberg, Heidelberg, Germany

<sup>3</sup> Center for Medical Biometry and Medical Informatics, Institute for Medical Biometry and Statistics, Medical Center, University of Freiburg, Germany

<sup>4</sup> PHARMO Institute for Drug Outcomes Research, Utrecht, The Netherlands

<sup>5</sup> Netherlands Comprehensive Cancer Organisation, Utrecht, The Netherlands

<sup>6</sup> Division of Preventive Oncology, National Center for Tumor Diseases (NCT), German Cancer Research Center (DKFZ), Heidelberg, Germany

<sup>7</sup> German Cancer Consortium (DKTK), German Cancer Research Center (DKFZ), Heidelberg, Germany

**\*Correspondence to** Hermann Brenner, Division of Clinical Epidemiology and Aging Research, German Cancer Research Center (dkfz), Im Neuenheimer Feld 581, 69120 Heidelberg, Germany, Phone: +49-6221-42-1300; Fax: +49-6221-42-1302; E-mail: [h.brenner@dkfz.de](mailto:h.brenner@dkfz.de)

Supplementary Tables: 4

**SUPPLEMENTARY TABLES**

**Supplementary Table 1. Classification of Medication Classes according to ATC codes of the Dispensings**

| <b>Drug class</b>                                                                         | <b>International Nonproprietary Name (INN)/Subclass</b>                                                          | <b>ATC Codes</b>                                                                                                                          |
|-------------------------------------------------------------------------------------------|------------------------------------------------------------------------------------------------------------------|-------------------------------------------------------------------------------------------------------------------------------------------|
| <b><u>β-blockers</u></b>                                                                  |                                                                                                                  |                                                                                                                                           |
| Any β-blocker                                                                             | -                                                                                                                | Starting with 'C07'                                                                                                                       |
| Selective β-blocker (according WHO/ATC coding)                                            | Metoprolol, Atenolol, Acebutolol, Bisoprolol, Celiprolol, Esmolol, Nebivolol                                     | C07AB<br>Combinations: C07BB, C07CB, C07DB, C07EB, C07FB                                                                                  |
| Nonselective β-blocker (according WHO/ATC coding)                                         | Alprenolol, Oxprenolol, Pindolol, Propranolol, Timolol, Sotalol                                                  | C07AA<br>Combinations: C07BA, C07CA, C07DA, C07EA, C07FA                                                                                  |
| Alpha and β-blocking agents                                                               | Carvedilol, Laβlol                                                                                               | C07AG<br>Combinations: C07BG, C07CG                                                                                                       |
| Lipophilic character                                                                      | Propranolol, Nebivolol, Carvedilol, Alprenolol, Bisoprolol, Metoprolol, Pindolol, Acebutolol, Timolol (systemic) | See single active ingredients                                                                                                             |
| Hydrophilic character                                                                     | Atenolol, Sotalol, Nadolol                                                                                       | See single active ingredients                                                                                                             |
| <b><u>Single active ingredients (and combinations)</u></b>                                |                                                                                                                  |                                                                                                                                           |
| Metoprolol                                                                                | C07AB02, C07FB02, C07CB02, C07BB02, C07BB52, C07AB52                                                             |                                                                                                                                           |
| Bisoprolol                                                                                | C07AB07, C07FB07, C07BB07, C07AB57, C09BX02                                                                      |                                                                                                                                           |
| Carvedilol                                                                                | C07AG02                                                                                                          |                                                                                                                                           |
| Atenolol                                                                                  | C07AB03, C07FB03, C07CB03, C07CB53, C07BB03, C07DB01, C07AB11                                                    |                                                                                                                                           |
| Propranolol                                                                               | C07AA05, C07FA05, C07BA05                                                                                        |                                                                                                                                           |
| Nebivolol                                                                                 | C07AB12, C07FB12, C07BB12                                                                                        |                                                                                                                                           |
| Sotalol                                                                                   | C07AA07, C07BA07, C07AA57                                                                                        |                                                                                                                                           |
| Timolol (systemic)                                                                        | C07AA06, C07AA06, C07BA06, C07DA06                                                                               |                                                                                                                                           |
| Pindolol                                                                                  | C07AA17, C07CA17, C07AA14, C07AA03, C07CA03                                                                      |                                                                                                                                           |
| Acebutolol                                                                                | C07AB04, C07BB04                                                                                                 |                                                                                                                                           |
| <b>Other antihypertensive treatment</b>                                                   | C02, C03, C04, C08, C09                                                                                          |                                                                                                                                           |
| <b>Statins</b>                                                                            | C10AA, C10BA, C10BX                                                                                              |                                                                                                                                           |
| <b>Non-steroidal anti-inflammatory drugs (NSAIDs)</b>                                     | M01A, M01B, N02BA, B01AC06, B01AC30, B01AC34, B01AC36, B01AC56, B01AC30                                          |                                                                                                                                           |
| <b>Diabetes medication</b>                                                                | A10                                                                                                              |                                                                                                                                           |
| <b>Comparison group (medications used for same indications as β-blockers)<sup>a</sup></b> | Coronary Heart Disease & Acute Myocardial Infarction                                                             | C01DA, C08, C01EB17, C01DX16, C01EB15, C01EB18, C01DX12, C10A, C10B, B01AC09A, C09B, C09C, C09D, C03A, C03B, C03C, C03D, C03E, C02D, C01A |
|                                                                                           | Congestive Heart Failure                                                                                         | C01B, C08D, B01AA, B01AE, B01AF, C01BG11, C01EB10                                                                                         |
|                                                                                           | Cardiac Arrhythmias                                                                                              | C09X, C02A, C02CA, C02LA, C02LB, C02LC, C02LE, C02LF, C02LG, C02LK                                                                        |
|                                                                                           | Hypertension                                                                                                     |                                                                                                                                           |

<sup>a</sup> If medications are prescribed for more than one indication, they are listed only once.

**Supplementary Table 2. Association between Pre-diagnostic  $\beta$ -blocker use and Lung Cancer Survival (Overall, by Cancer Site and Cancer Stage) when Comparing to Non-use.\***

| $\beta$ -blocker/<br>subgroup                  | All eligible patients (N=6172) |        |                 |                  |               | Propensity score matched cohort (N=2874) |        |                 |                  |               |
|------------------------------------------------|--------------------------------|--------|-----------------|------------------|---------------|------------------------------------------|--------|-----------------|------------------|---------------|
|                                                | N                              | Events | HR <sup>a</sup> | 95% CI           | P             | N                                        | Events | HR <sup>b</sup> | 95% CI           | P             |
| <b>No <math>\beta</math>-blocker</b>           |                                |        |                 |                  |               |                                          |        |                 |                  |               |
| Total                                          | 4735                           | 4120   | 1.00            | Ref.             | /             | 1437                                     | 1280   | 1.00            | Ref.             | /             |
| Stage I                                        | 713                            | 414    | 1.00            | Ref.             | /             | 229                                      | 143    | 1.00            | Ref.             | /             |
| Stage II                                       | 266                            | 171    | 1.00            | Ref.             | /             | 80                                       | 63     | 1.00            | Ref.             | /             |
| Stage III                                      | 1348                           | 1229   | 1.00            | Ref.             | /             | 412                                      | 384    | 1.00            | Ref.             | /             |
| Stage IV                                       | 1907                           | 1847   | 1.00            | Ref.             | /             | 538                                      | 525    | 1.00            | Ref.             | /             |
| NSCLC                                          | 3458                           | 2919   | 1.00            | Ref.             | /             | 1014                                     | 879    | 1.00            | Ref.             | /             |
| SCLC                                           | 814                            | 773    | 1.00            | Ref.             | /             | 249                                      | 240    | 1.00            | Ref.             | /             |
| <b>Any <math>\beta</math>-blocker</b>          |                                |        |                 |                  |               |                                          |        |                 |                  |               |
| Total                                          | 1437                           | 1265   | 0.99            | 0.92-1.07        | 0.8114        | 1437                                     | 1265   | 1.00            | 0.93-1.09        | 0.9325        |
| Stage I                                        | 239                            | 152    | 1.06            | 0.84-1.33        | 0.6261        | 239                                      | 152    | 1.03            | 0.82-1.29        | 0.8139        |
| Stage II                                       | 79                             | 65     | 1.03            | 0.70-1.52        | 0.8629        | 79                                       | 65     | 0.99            | 0.69-1.42        | 0.9631        |
| Stage III                                      | 411                            | 366    | <b>0.86</b>     | <b>0.75-0.98</b> | <b>0.0278</b> | 411                                      | 366    | 0.92            | 0.79-1.06        | 0.2540        |
| Stage IV                                       | 549                            | 539    | 1.08            | 0.96-1.21        | 0.2125        | 549                                      | 539    | 1.11            | 0.99-1.25        | 0.0797        |
| NSCLC                                          | 1027                           | 883    | 0.98            | 0.90-1.07        | 0.7142        | 1027                                     | 883    | 0.99            | 0.90-1.09        | 0.7871        |
| SCLC                                           | 252                            | 239    | 1.13            | 0.95-1.34        | 0.1541        | 252                                      | 239    | 1.14            | 0.95-1.36        | 0.1493        |
| <b>Selective <math>\beta</math>-blocker</b>    |                                |        |                 |                  |               |                                          |        |                 |                  |               |
| Total                                          | 1278                           | 1122   | 0.98            | 0.91-1.05        | 0.5515        | 1278                                     | 1122   | 0.97            | 0.90-1.06        | 0.5212        |
| Stage I                                        | 215                            | 139    | 1.12            | 0.89-1.41        | 0.3208        | 215                                      | 139    | 1.08            | 0.86-1.37        | 0.5098        |
| Stage II                                       | 69                             | 56     | 0.97            | 0.65-1.47        | 0.8989        | 69                                       | 56     | 0.96            | 0.66-1.41        | 0.8543        |
| Stage III                                      | 368                            | 327    | <b>0.85</b>     | <b>0.74-0.98</b> | <b>0.0277</b> | 368                                      | 327    | 0.90            | 0.77-1.04        | 0.1556        |
| Stage IV                                       | 484                            | 474    | 1.07            | 0.95-1.21        | 0.2395        | 484                                      | 474    | 1.07            | 0.95-1.21        | 0.2447        |
| NSCLC                                          | 909                            | 781    | 0.99            | 0.91-1.09        | 0.8636        | 909                                      | 781    | 0.98            | 0.88-1.08        | 0.6280        |
| SCLC                                           | 229                            | 216    | 1.09            | 0.91-1.30        | 0.3482        | 229                                      | 216    | 1.04            | 0.87-1.25        | 0.6517        |
| <b>Nonselective <math>\beta</math>-blocker</b> |                                |        |                 |                  |               |                                          |        |                 |                  |               |
| Total                                          | 178                            | 162    | 1.08            | 0.92-1.27        | 0.3488        | 178                                      | 162    | <b>1.19</b>     | <b>1.01-1.41</b> | <b>0.0398</b> |
| Stage I                                        | 26                             | 15     | 0.81            | 0.47-1.40        | 0.4516        | 26                                       | 15     | 0.84            | 0.48-1.47        | 0.5350        |
| Stage II                                       | 10                             | 9      | 1.25            | 0.60-2.58        | 0.5520        | 10                                       | 9      | 1.11            | 0.59-2.06        | 0.7536        |
| Stage III                                      | 53                             | 49     | 0.99            | 0.73-1.33        | 0.9409        | 53                                       | 49     | 1.22            | 0.90-1.65        | 0.2015        |
| Stage IV                                       | 70                             | 70     | 1.00            | 0.79-1.28        | 0.9759        | 70                                       | 70     | 1.14            | 0.91-1.43        | 0.2498        |
| NSCLC                                          | 131                            | 115    | 0.98            | 0.81-1.19        | 0.8428        | 131                                      | 115    | 1.09            | 0.90-1.33        | 0.3745        |
| SCLC                                           | 25                             | 25     | 1.22            | 0.81-1.84        | 0.3461        | 25                                       | 25     | <b>1.67</b>     | <b>1.16-2.40</b> | <b>0.0062</b> |
| <b>Hydrophilic <math>\beta</math>-blocker</b>  |                                |        |                 |                  |               |                                          |        |                 |                  |               |
| Total                                          | 349                            | 307    | <b>0.87</b>     | <b>0.77-0.98</b> | <b>0.0256</b> | 349                                      | 307    | 0.98            | 0.87-1.10        | 0.7142        |
| Stage I                                        | 55                             | 40     | 1.23            | 0.87-1.73        | 0.2442        | 55                                       | 40     | 1.36            | 0.95-1.95        | 0.0884        |
| Stage II                                       | 25                             | 23     | 1.04            | 0.63-1.70        | 0.8849        | 25                                       | 23     | 1.26            | 0.80-1.99        | 0.3124        |
| Stage III                                      | 89                             | 73     | <b>0.72</b>     | <b>0.56-0.92</b> | <b>0.0084</b> | 89                                       | 73     | 0.82            | 0.63-1.08        | 0.1643        |
| Stage IV                                       | 134                            | 132    | 0.90            | 0.75-1.09        | 0.2841        | 134                                      | 132    | 1.01            | 0.85-1.22        | 0.8814        |
| NSCLC                                          | 234                            | 203    | 0.92            | 0.80-1.07        | 0.2961        | 234                                      | 203    | 1.01            | 0.87-1.17        | 0.9306        |
| SCLC                                           | 67                             | 63     | 0.94            | 0.71-1.23        | 0.6312        | 67                                       | 63     | 1.06            | 0.80-1.40        | 0.6802        |
| <b>Lipophilic <math>\beta</math>-blocker</b>   |                                |        |                 |                  |               |                                          |        |                 |                  |               |
| Total                                          | 1073                           | 943    | 1.06            | 0.98-1.14        | 0.1669        | 1073                                     | 943    | 1.01            | 0.93-1.10        | 0.8280        |
| Stage I                                        | 184                            | 111    | 0.94            | 0.74-1.21        | 0.6467        | 184                                      | 111    | 0.88            | 0.70-1.110       | 0.2814        |
| Stage II                                       | 53                             | 41     | 0.98            | 0.65-1.47        | 0.9163        | 53                                       | 41     | 0.83            | 0.56-1.21        | 0.3335        |
| Stage III                                      | 320                            | 291    | 0.95            | 0.82-1.10        | 0.4936        | 320                                      | 291    | 1.00            | 0.86-1.16        | 0.9998        |
| Stage IV                                       | 405                            | 397    | <b>1.15</b>     | <b>1.01-1.30</b> | <b>0.0294</b> | 405                                      | 397    | 1.11            | 0.98-1.26        | 0.0929        |

| $\beta$ -blocker/<br>subgroup | All eligible patients (N=6172) |        |                 |           |        | Propensity score matched cohort (N=2874) |        |                 |           |        |
|-------------------------------|--------------------------------|--------|-----------------|-----------|--------|------------------------------------------|--------|-----------------|-----------|--------|
|                               | N                              | Events | HR <sup>a</sup> | 95% CI    | P      | N                                        | Events | HR <sup>b</sup> | 95% CI    | P      |
| NSCLC                         | 782                            | 669    | 1.03            | 0.93-1.13 | 0.6013 | 782                                      | 669    | 0.98            | 0.89-1.09 | 0.7449 |
| SCLC                          | 181                            | 172    | 1.14            | 0.95-1.38 | 0.1696 | 181                                      | 172    | 1.08            | 0.89-1.30 | 0.4499 |

Abbreviations: ATC=Anatomical Therapeutic Chemical Code, CI=Confidence interval, HR=Hazard ratio, NSAIDs=Non-steroidal anti-inflammatory drugs, NSCLC=Non-small cell lung cancer, PY=Person-years, SCLC=Small cell lung cancer

<sup>a</sup> Hazard ratio from the Cox proportional hazard model  $\beta$ -blocker use four months prior diagnosis; adjusted for age, sex, year of diagnosis, socio-economic status, comorbidities (cardiovascular, hypertension, cerebrovascular, lung, diabetes), treatment (surgery, chemotherapy, radiotherapy, radiotherapy aimed at metastasis), best supportive care, stage, histology (NSCLC, SCLC, Other), previous cancer, time-dependent use of NSAIDs, statins, antihypertensive (other than  $\beta$ -blocker) and diabetes medication after diagnosis and number of distinct ATC classes prescribed during four months prior to diagnosis. Stratification factors were omitted from the stratified models.

<sup>b</sup> Hazard ratio from the Cox proportional hazard model for  $\beta$ -blocker use four months prior diagnosis; adjusted for time-dependent use of NSAIDs, statins, antihypertensive (other than  $\beta$ -blocker) and diabetes medication.

**Supplementary Table 3. Association between Post-diagnostic  $\beta$ -blocker use and Lung Cancer Survival (Overall, by Histological Subtype and Cancer Stage) when Comparing to Non-use.\***

| $\beta$ -blocker/<br>subgroup                  | All eligible patients (N=6172) |        |                 |                  |               | Propensity score matched cohort (N=2874) |        |                 |                  |               |
|------------------------------------------------|--------------------------------|--------|-----------------|------------------|---------------|------------------------------------------|--------|-----------------|------------------|---------------|
|                                                | PY                             | Events | HR <sup>a</sup> | 95% CI           | P             | PY                                       | Events | HR <sup>b</sup> | 95% CI           | P             |
| <b>No <math>\beta</math>-blocker</b>           |                                |        |                 |                  |               |                                          |        |                 |                  |               |
| Total                                          | 7738                           | 3800   | 1.00            | Ref.             | /             | 1944                                     | 1132   | 1.00            | Ref.             | /             |
| Stage I                                        | 2575                           | 349    | 1.00            | Ref.             | /             | 652                                      | 113    | 1.00            | Ref.             | /             |
| Stage II                                       | 773                            | 155    | 1.00            | Ref.             | /             | 170                                      | 58     | 1.00            | Ref.             | /             |
| Stage III                                      | 1975                           | 1107   | 1.00            | Ref.             | /             | 489                                      | 329    | 1.00            | Ref.             | /             |
| Stage IV                                       | 1677                           | 1766   | 1.00            | Ref.             | /             | 392                                      | 488    | 1.00            | Ref.             | /             |
| NSCLC                                          | 6525                           | 2678   | 1.00            | Ref.             | /             | 1483                                     | 880    | 1.00            | Ref.             | /             |
| SCLC                                           | 950                            | 723    | 1.00            | Ref.             | /             | 237                                      | 240    | 1.00            | Ref.             | /             |
| <b>Any <math>\beta</math>-blocker</b>          |                                |        |                 |                  |               |                                          |        |                 |                  |               |
| Total                                          | 3453                           | 1585   | <b>1.09</b>     | <b>1.02-1.17</b> | <b>0.0148</b> | 2855                                     | 1413   | 1.03            | 0.95-1.12        | 0.4430        |
| Stage I                                        | 1375                           | 217    | 1.08            | 0.88-1.33        | 0.4492        | 1111                                     | 182    | 1.01            | 0.79-1.28        | 0.9429        |
| Stage II                                       | 336                            | 81     | 1.06            | 0.75-1.49        | 0.7560        | 226                                      | 70     | 0.99            | 0.69-1.42        | 0.9510        |
| Stage III                                      | 908                            | 488    | 1.00            | 0.88-1.14        | 0.9990        | 777                                      | 421    | 0.96            | 0.83-1.12        | 0.6061        |
| Stage IV                                       | 474                            | 620    | <b>1.13</b>     | <b>1.02-1.26</b> | <b>0.0257</b> | 440                                      | 576    | 1.11            | 0.99-1.25        | 0.0851        |
| NSCLC                                          | 2824                           | 1124   | 1.08            | 0.99-1.17        | 0.0835        | 2295                                     | 985    | 0.99            | 0.90-1.09        | 0.8799        |
| SCLC                                           | 312                            | 289    | <b>1.26</b>     | <b>1.07-1.48</b> | <b>0.0057</b> | 286                                      | 268    | <b>1.22</b>     | <b>1.02-1.46</b> | <b>0.0279</b> |
| <b>Selective <math>\beta</math>-blocker</b>    |                                |        |                 |                  |               |                                          |        |                 |                  |               |
| Total                                          | 3079                           | 1404   | <b>1.08</b>     | <b>1.00-1.16</b> | <b>0.0379</b> | 2569                                     | 1260   | 1.01            | 0.93-1.09        | 0.8848        |
| Stage I                                        | 1204                           | 192    | 1.15            | 0.94-1.42        | 0.1834        | 978                                      | 164    | 1.07            | 0.84-1.35        | 0.5886        |
| Stage II                                       | 297                            | 73     | 1.13            | 0.79-1.62        | 0.5152        | 200                                      | 63     | 1.03            | 0.71-1.50        | 0.8807        |
| Stage III                                      | 817                            | 439    | 1.01            | 0.88-1.14        | 0.9365        | 707                                      | 382    | 0.96            | 0.82-1.12        | 0.5941        |
| Stage IV                                       | 422                            | 542    | <b>1.13</b>     | <b>1.01-1.26</b> | <b>0.0370</b> | 395                                      | 508    | 1.07            | 0.95-1.20        | 0.2967        |
| NSCLC                                          | 2490                           | 995    | <b>1.10</b>     | <b>1.01-1.19</b> | <b>0.0321</b> | 2040                                     | 882    | 1.00            | 0.91-1.11        | 0.9492        |
| SCLC                                           | 293                            | 258    | <b>1.19</b>     | <b>1.01-1.41</b> | <b>0.0425</b> | 268                                      | 239    | 1.09            | 0.91-1.30        | 0.3626        |
| <b>Nonselective <math>\beta</math>-blocker</b> |                                |        |                 |                  |               |                                          |        |                 |                  |               |
| Total                                          | 519                            | 241    | <b>1.17</b>     | <b>1.02-1.33</b> | <b>0.0226</b> | 400                                      | 205    | <b>1.21</b>     | <b>1.04-1.41</b> | <b>0.0143</b> |
| Stage I                                        | 218                            | 34     | 0.97            | 0.68-1.39        | 0.8748        | 164                                      | 25     | 0.96            | 0.64-1.45        | 0.8496        |
| Stage II                                       | 53                             | 15     | 1.36            | 0.76-2.44        | 0.2956        | 32                                       | 12     | 1.26            | 0.71-2.25        | 0.4346        |
| Stage III                                      | 150                            | 80     | 1.08            | 0.86-1.37        | 0.5123        | 123                                      | 67     | 1.18            | 0.90-1.55        | 0.2311        |
| Stage IV                                       | 60                             | 87     | 1.04            | 0.84-1.30        | 0.7074        | 51                                       | 76     | 1.18            | 0.95-1.45        | 0.1296        |
| NSCLC                                          | 455                            | 175    | 1.06            | 0.90-1.23        | 0.4941        | 354                                      | 143    | 1.08            | 0.90-1.28        | 0.4204        |
| SCLC                                           | 28                             | 39     | 1.33            | 0.95-1.85        | 0.0930        | 24                                       | 35     | <b>1.76</b>     | <b>1.29-2.38</b> | <b>0.0003</b> |
| <b>Hydrophilic <math>\beta</math>-blocker</b>  |                                |        |                 |                  |               |                                          |        |                 |                  |               |
| Total                                          | 895                            | 383    | 0.93            | 0.84-1.04        | 0.2035        | 743                                      | 342    | 1.00            | 0.89-1.12        | 0.9450        |
| Stage I                                        | 288                            | 56     | 1.19            | 0.89-1.60        | 0.2314        | 232                                      | 48     | 1.34            | 0.98-1.83        | 0.0670        |
| Stage II                                       | 103                            | 28     | 1.01            | 0.64-1.59        | 0.9661        | 60                                       | 24     | 1.32            | 0.84-2.09        | 0.2295        |
| Stage III                                      | 237                            | 103    | 0.83            | 0.68-1.03        | 0.0902        | 210                                      | 89     | 0.88            | 0.68-1.14        | 0.3226        |
| Stage IV                                       | 116                            | 149    | 0.94            | 0.79-1.12        | 0.4660        | 106                                      | 136    | 1.02            | 0.86-1.23        | 0.7873        |
| NSCLC                                          | 674                            | 261    | 0.97            | 0.85-1.11        | 0.6525        | 542                                      | 227    | 1.01            | 0.87-1.16        | 0.9239        |
| SCLC                                           | 89                             | 74     | 1.02            | 0.79-1.31        | 0.9008        | 84                                       | 69     | 1.11            | 0.85-1.45        | 0.4569        |
| <b>Lipophilic <math>\beta</math>-blocker</b>   |                                |        |                 |                  |               |                                          |        |                 |                  |               |
| Total                                          | 2733                           | 1228   | 1.15            | 1.07-1.24        | 0.0002        | 2246                                     | 1092   | 1.03            | 0.95-1.12        | 0.4779        |
| Stage I                                        | 1154                           | 169    | 0.99            | 0.80-1.22        | 0.9111        | 924                                      | 142    | 0.89            | 0.71-1.13        | 0.3376        |
| Stage II                                       | 250                            | 59     | 1.21            | 0.84-1.73        | 0.3084        | 169                                      | 49     | 0.88            | 0.61-1.28        | 0.5169        |
| Stage III                                      | 729                            | 400    | 1.09            | 0.96-1.24        | 0.1979        | 619                                      | 345    | 1.04            | 0.89-1.21        | 0.6046        |
| Stage IV                                       | 358                            | 465    | <b>1.19</b>     | <b>1.06-1.33</b> | <b>0.0041</b> | 336                                      | 435    | 1.10            | 0.97-1.24        | 0.1435        |

| $\beta$ -blocker/<br>subgroup | All eligible patients (N=6172) |        |                 |                  |               | Propensity score matched cohort (N=2874) |        |                 |           |        |
|-------------------------------|--------------------------------|--------|-----------------|------------------|---------------|------------------------------------------|--------|-----------------|-----------|--------|
|                               | PY                             | Events | HR <sup>a</sup> | 95% CI           | P             | PY                                       | Events | HR <sup>b</sup> | 95% CI    | P      |
| NSCLC                         | 2287                           | 883    | <b>1.12</b>     | <b>1.03-1.22</b> | <b>0.0112</b> | 1849                                     | 773    | 0.99            | 0.90-1.09 | 0.8658 |
| SCLC                          | 234                            | 217    | <b>1.23</b>     | <b>1.04-1.47</b> | <b>0.0171</b> | 214                                      | 201    | 1.14            | 0.95-1.38 | 0.1530 |

Abbreviations: ATC=Anatomical Therapeutic Chemical Code, CI=Confidence interval, HR=Hazard ratio, NSAIDs=Non-steroidal anti-inflammatory drugs, NSCLC=Non-small cell lung cancer, PY=Person-years, SCLC=Small cell lung cancer

<sup>a</sup> Hazard ratio from the Cox proportional hazard model for time-dependent  $\beta$ -blocker use; adjusted for age, sex, year of diagnosis, socio-economic status, comorbidities (cardiovascular, hypertension, cerebrovascular, lung, diabetes), treatment (surgery, chemotherapy, radiotherapy, radiotherapy aimed at metastasis), best supportive care, stage, histology (NSCLC, SCLC, Other), previous cancer, time-dependent use of NSAIDs, statins, antihypertensive (other than  $\beta$ -blocker) and diabetes medication after diagnosis and number of distinct ATC classes prescribed during four months prior to diagnosis. Stratification factors were omitted from the stratified models.

<sup>b</sup> Hazard ratio from the Cox proportional hazard model for time-dependent  $\beta$ -blocker use; adjusted for time-dependent use of NSAIDs, statins, antihypertensive (other than  $\beta$ -blocker) and diabetes medication.

**Supplementary Table 4. Association between Post-diagnostic Cumulative Dose and Cumulative Duration of  $\beta$ -blocker use and Overall Lung Cancer Survival (Overall, by  $\beta$ -receptor Affinity and Pharmacokinetic Characteristics) when Comparing to Non-use.\***

| $\beta$ -blocker/Exposure                       | All eligible patients (N=6172) |        |                 |                  |               | Propensity score matched cohort (N=2874) |        |                 |                  |               |
|-------------------------------------------------|--------------------------------|--------|-----------------|------------------|---------------|------------------------------------------|--------|-----------------|------------------|---------------|
|                                                 | PY                             | Events | HR <sup>a</sup> | 95% CI           | P             | PY                                       | Events | HR <sup>b</sup> | 95% CI           | P             |
| <b>Any <math>\beta</math>-blocker</b>           |                                |        |                 |                  |               |                                          |        |                 |                  |               |
| 0 DDDs                                          | 7555                           | 3778   | 1.00            | Ref.             | /             | 1864                                     | 1123   | 1.00            | Ref.             | /             |
| >0 - 365 DDDs                                   | 2047                           | 1223   | <b>1.08</b>     | <b>1.00-1.16</b> | <b>0.0542</b> | 1625                                     | 1093   | 1.04            | 0.95-1.13        | 0.4214        |
| 366+ DDDs                                       | 1077                           | 251    | 0.98            | 0.85-1.13        | 0.7492        | 962                                      | 232    | 0.98            | 0.84-1.15        | 0.8337        |
| Trend (180 DDDs)                                |                                |        | 1.00            | 0.97-1.02        | 0.7726        |                                          |        | 0.99            | 0.97-1.02        | 0.4667        |
| 0 months                                        | 7738                           | 3800   | 1.00            | Ref.             | /             | 1944                                     | 1132   | 1.00            | Ref.             | /             |
| 1-12 months                                     | 1799                           | 1178   | <b>1.14</b>     | <b>1.05-1.23</b> | <b>0.0014</b> | 1410                                     | 1047   | 1.08            | 0.98-1.18        | 0.1197        |
| 13-24 months                                    | 627                            | 213    | 0.94            | 0.83-1.07        | 0.3658        | 543                                      | 193    | 0.92            | 0.79-1.07        | 0.2698        |
| 25-36 months                                    | 375                            | 103    | 0.97            | 0.79-1.20        | 0.8120        | 331                                      | 96     | 0.94            | 0.74-1.20        | 0.6430        |
| > 36 months                                     | 652                            | 91     | <b>1.28</b>     | <b>1.04-1.57</b> | <b>0.0224</b> | 571                                      | 77     | 1.06            | 0.80-1.39        | 0.6932        |
| Trend (12 months)                               |                                |        | <b>1.04</b>     | <b>1.01-1.08</b> | <b>0.0124</b> |                                          |        | 1.01            | 0.97-1.05        | 0.7977        |
| <b>Selective <math>\beta</math>-blockers</b>    |                                |        |                 |                  |               |                                          |        |                 |                  |               |
| 0 DDDs                                          | 7908                           | 3948   | 1.00            | Ref.             | /             | 2129                                     | 1268   | 1.00            | Ref.             | /             |
| >0 - 365 DDDs                                   | 1822                           | 1089   | <b>1.07</b>     | <b>1.00-1.16</b> | <b>0.0665</b> | 1475                                     | 981    | 1.01            | 0.93-1.1         | 0.8052        |
| 366+ DDDs                                       | 966                            | 218    | 0.95            | 0.81-1.10        | 0.4750        | 853                                      | 201    | 0.95            | 0.8-1.11         | 0.4966        |
| Trend (180 DDDs)                                |                                |        | 0.99            | 0.97-1.02        | 0.5299        |                                          |        | 0.99            | 0.96-1.01        | 0.3173        |
| 0 months                                        | 8112                           | 3981   | 1.00            | Ref.             | /             | 2230                                     | 1285   | 1.00            | Ref.             | /             |
| 1-12 months                                     | 1585                           | 1037   | <b>1.14</b>     | <b>1.05-1.23</b> | <b>0.0017</b> | 1267                                     | 927    | 1.05            | 0.96-1.16        | 0.2808        |
| 13-24 months                                    | 567                            | 191    | 0.89            | 0.77-1.02        | 0.0820        | 496                                      | 176    | 0.86            | 0.73-1.00        | 0.0514        |
| 25-36 months                                    | 340                            | 90     | 0.98            | 0.79-1.21        | 0.8301        | 297                                      | 85     | 0.98            | 0.76-1.25        | 0.8462        |
| > 36 months                                     | 587                            | 86     | 1.27            | 1.02-1.57        | 0.0306        | 509                                      | 72     | 1.10            | 0.84-1.44        | 0.5024        |
| Trend (12 months)                               |                                |        | <b>1.04</b>     | <b>1.00-1.08</b> | <b>0.0286</b> |                                          |        | 1.00            | 0.96-1.04        | 0.9009        |
| <b>Nonselective <math>\beta</math>-blockers</b> |                                |        |                 |                  |               |                                          |        |                 |                  |               |
| 0 DDDs                                          | 1022                           | 5032   | 1.00            | Ref.             | /             | 4104                                     | 2260   | 1.00            | Ref.             | /             |
| >0 - 365 DDDs                                   | 350                            | 198    | <b>1.20</b>     | <b>1.04-1.39</b> | <b>0.0131</b> | 244                                      | 168    | <b>1.29</b>     | <b>1.10-1.52</b> | <b>0.0018</b> |
| 366+ DDDs                                       | 115                            | 25     | 0.83            | 0.56-1.23        | 0.3542        | 112                                      | 23     | 0.86            | 0.61-1.22        | 0.4004        |
| Trend (180 DDDs)                                |                                |        | 1.02            | 0.97-1.07        | 0.5301        |                                          |        | 1.01            | 0.96-1.06        | 0.6810        |
| 0 months                                        | 1067                           | 5144   | 1.00            | Ref.             | /             | 4399                                     | 2340   | 1.00            | Ref.             | /             |
| 1-12 months                                     | 345                            | 204    | <b>1.19</b>     | <b>1.02-1.38</b> | <b>0.0260</b> | 250                                      | 175    | <b>1.28</b>     | <b>1.09-1.51</b> | <b>0.0033</b> |
| 13-24 months                                    | 78                             | 20     | 1.12            | 0.83-1.52        | 0.4680        | 56                                       | 15     | 1.16            | 0.83-1.63        | 0.3842        |
| 25-36 months                                    | 40                             | 13     | 1.05            | 0.58-1.90        | 0.8803        | 37                                       | 11     | 1.00            | 0.57-1.77        | 0.9886        |
| > 36 months                                     | 57                             | 4      | 1.12            | 0.56-2.27        | 0.7476        | 57                                       | 4      | 0.64            | 0.32-1.28        | 0.2109        |
| Trend (12 months)                               |                                |        | 1.07            | 0.99-1.15        | 0.1056        |                                          |        | 1.03            | 0.95-1.13        | 0.4535        |
| <b>Hydrophilic <math>\beta</math>-blockers</b>  |                                |        |                 |                  |               |                                          |        |                 |                  |               |
| 0 DDDs                                          | 9861                           | 4882   | 1.00            | Ref.             | /             | 3774                                     | 2118   | 1.00            | Ref.             | /             |
| >0 - 365 DDDs                                   | 569                            | 318    | 1.01            | 0.90-1.13        | 0.8772        | 431                                      | 281    | 1.06            | 0.93-1.20        | 0.3682        |
| 366+ DDDs                                       | 250                            | 52     | 0.63            | 0.47-0.83        | 0.0010        | 245                                      | 49     | 0.79            | 0.60-1.04        | 0.0946        |
| Trend (180 DDDs)                                |                                |        | 0.95            | 0.92-0.99        | 0.0262        |                                          |        | 0.99            | 0.95-1.03        | 0.6129        |
| 0 months                                        | 1029                           | 5002   | 1.00            | Ref.             | /             | 4056                                     | 2203   | 1.00            | Ref.             | /             |
| 1-12 months                                     | 520                            | 303    | 1.00            | 0.88-1.14        | 0.9609        | 407                                      | 271    | 1.03            | 0.90-1.18        | 0.6307        |
| 13-24 months                                    | 149                            | 43     | 0.82            | 0.65-1.04        | 0.0996        | 122                                      | 38     | 0.98            | 0.76-1.26        | 0.8487        |
| 25-36 months                                    | 98                             | 23     | 0.76            | 0.50-1.17        | 0.2129        | 88                                       | 20     | 0.86            | 0.56-1.33        | 0.5013        |
| > 36 months                                     | 128                            | 14     | 0.78            | 0.51-1.18        | 0.2368        | 127                                      | 13     | 0.80            | 0.49-1.30        | 0.3742        |

| $\beta$ -blocker/Exposure                            | All eligible patients (N=6172) |        |                 |                  |                   | Propensity score matched cohort (N=2874) |        |                 |           |        |
|------------------------------------------------------|--------------------------------|--------|-----------------|------------------|-------------------|------------------------------------------|--------|-----------------|-----------|--------|
|                                                      | PY                             | Events | HR <sup>a</sup> | 95% CI           | P                 | PY                                       | Events | HR <sup>b</sup> | 95% CI    | P      |
| <b>Trend (12 months)</b>                             |                                |        | 0.95            | 0.89-1.01        | 0.0925            |                                          |        | 0.98            | 0.92-1.04 | 0.5307 |
| <b><u>Lipophilic <math>\beta</math>-blockers</u></b> |                                |        |                 |                  |                   |                                          |        |                 |           |        |
| <b>0 DDDs</b>                                        | 8247                           | 4133   | 1.00            | Ref.             | /                 | 2444                                     | 1442   | 1.00            | Ref.      | /      |
| <b>&gt;0 - 365 DDDs</b>                              | 1650                           | 946    | 1.12            | 1.04-1.21        | 0.0046            | 1322                                     | 848    | 1.02            | 0.94-1.12 | 0.6032 |
| <b>366+ DDDs</b>                                     | 809                            | 179    | 1.08            | 0.92-1.27        | 0.3432            | 701                                      | 163    | 0.98            | 0.82-1.16 | 0.7953 |
| <b>Trend (180 DDDs)</b>                              |                                |        | 1.02            | 0.99-1.04        | 0.2409            |                                          |        | 0.99            | 0.96-1.02 | 0.4521 |
| <b>0 months</b>                                      | 8458                           | 4157   | 1.00            | Ref.             | /                 | 2553                                     | 1453   | 1.00            | Ref.      | /      |
| <b>1-12 months</b>                                   | 1428                           | 912    | <b>1.20</b>     | <b>1.11-1.30</b> | <b>&lt;0.0001</b> | 1121                                     | 807    | 1.08            | 0.98-1.19 | 0.1045 |
| <b>13-24 months</b>                                  | 512                            | 167    | 0.95            | 0.83-1.10        | 0.5219            | 446                                      | 154    | 0.88            | 0.75-1.03 | 0.1001 |
| <b>25-36 months</b>                                  | 298                            | 76     | 1.03            | 0.82-1.29        | 0.8077            | 256                                      | 70     | 0.95            | 0.74-1.23 | 0.7136 |
| <b>&gt; 36 months</b>                                | 495                            | 73     | <b>1.50</b>     | <b>1.20-1.89</b> | <b>0.0004</b>     | 423                                      | 61     | 1.13            | 0.86-1.48 | 0.3833 |
| <b>Trend (12 months)</b>                             |                                |        | <b>1.08</b>     | <b>1.04-1.12</b> | <b>0.0001</b>     |                                          |        | 1.01            | 0.97-1.06 | 0.5823 |

Abbreviations: ATC=Anatomical Therapeutic Chemical Code, CI=Confidence interval, HR=Hazard ratio, NSAIDs=Non-steroidal anti-inflammatory drugs, PY=Person-years

<sup>a</sup> Hazard ratio from the Cox proportional hazard model; adjusted for age, sex, year of diagnosis, socio-economic status, comorbidities (cardiovascular, hypertension, cerebrovascular, lung, diabetes), treatment (surgery, chemotherapy, radiotherapy, radiotherapy aimed at metastasis), best supportive care, stage, histology (NSCLC, SCLC, Other), previous cancer, time-dependent use of NSAIDs, statins, antihypertensive (other than  $\beta$ -blocker) and diabetes medication after diagnosis and number of distinct ATC classes prescribed during four months prior to diagnosis. Stratification factors were omitted from the stratified models.

<sup>b</sup> Hazard ratio from the Cox proportional hazard model for time-dependent  $\beta$ -blocker use; adjusted for time-dependent use of NSAIDs, statins, antihypertensive (other than  $\beta$ -blocker) and diabetes medication.
